# Supplementary material for: Decadal-scale decay of landslide-derived fluvial suspended sediment after Typhoon Morakot
Source: Copernicus journal article supplement (doi:10.5194/egusphere-2023-1278), 2023-07-17
Supplement: Supplementary file 1 [file egusphere-2023-1278-supplement.zip]

Archive with 2 entries (2 files):
- Ruetenik et al. - Supplementary tables.xlsx
- Ruetenik et al. - Taiwan erosion supplement.pdf
