# Supplementary material for: Decadal-scale decay of landslide-derived fluvial suspended sediment after Typhoon Morakot
Source: Copernicus journal article supplement (doi:10.5194/egusphere-2023-1278), 2023-07-17
Supplement: Supplementary file 1 [file egusphere-2023-1278-supplement.zip › Ruetenik et al. - Supplementary tables.xlsx]

## Sheet: Table S1. Station information
Table S1. Summary information about the Taiwan Water Resources Agency (WRA) gauging stations analyzed in this study.
Focus stations (Figure 1 in the main text)
Focus station ID	WRA basin ID	WRA station ID	River name	Latitude (°N)	Longitude (°E)	Drainage area (km^2)	Monitoring period (*)	Average C measurements/yr (**)	Upstream stations (***)
Southern stations
S1	1730	H043	Gaoping River	22.7706	120.453	2831.96	1991-1994, 1996-2004, 2007-2009, 2010-2020	23.5862	1730-H058, 1730-H036
S2	1730	H036	Gaoping River	22.7122	120.648	402.128	1965-1991, 1994-1994, 1996-2009, 2010-2020	21.1636	1730-H058
S3	1580	H07	Bazhang River	23.4586	120.458	115.844	1970-1979, 1981-1987, 1989-1990, 1992-1992, 1994-2009, 2010-2020	16.5
S4	1580	H01	Bazhang River	23.4385	120.606	80.5298	1968-1979, 1981-1983, 1985-1989, 1992-1992, 1994-1994, 1996-1998, 2000-2009, 2010-2020	15.1132
S5	1510	H049	Zhuoshui River	23.6949	120.851	363.796	1972-2001, 2003-2009, 2010-2020	27.0816
S6	1510	H075	Zhuoshui River	23.7942	120.914	1563.28	2004-2009, 2010-2020	28.8333
S7	1510	H071	Zhuoshui River	23.8082	120.468	2942.24	2001-2002, 2004-2009, 2010-2020	25.5909	1730-H075, 1730-H063, 1730-H079, 1730-H050, 1730-H057, 1730-H071
S8	2200	H020	Beinan River	23.1275	121.172	622.482	1979-2009, 2011-2020	19.9286
S9	2200	H022	Beinan River	22.9749	121.165	791.203	2000-2009, 2011-2020	26	2200-H020, 2200-H027
S10	2200	H011	Beinan River	22.7922	121.146	1550.8	1948-1957, 1959-2009, 2011-2020	29.6575	2200-H020, 2200-H027, 2200-H022, 2200-H007
S11	1850	H04	Sizhong	22.1274	120.778	77.0295	2001-2009, 2011-2020	28.1
S12	1740	H02	Donggang River	22.5685	120.544	173.381	1966-1992, 1994-1994, 1996-2009, 2010-2020	22.0926
Northern stations
N1	1430	H032	Wu River	24.0582	120.906	416.868	1976-2003, 2005-2009, 2010-2011, 2014-2020	28.25
N2	1350	H012	Houlong River	24.5949	120.826	472.374	1992-2005, 2009-2009, 2010-2017, 2020-2020	26.1154	1350-H017, 1350-H01
N3	1340	H09	Zhonggang River	24.6177	121.006	139.241	1986-1986, 1990-2005, 2007-2007, 2009-2009, 2010-2020	23.4242
N4	1300	H014	Touqian River	24.669	121.114	218.814	1971-1974, 1976-1979, 1989-2005, 2009-2009, 2010-2020	20.359
N5	1300	H017	Touqian River	24.8079	121.019	499.708	1990-2005, 2009-2009, 2010-2020	23.069	1300-H014
N6	1290	H02	Fengshan River	24.8257	121.066	209.044	1970-1973, 1975-1975, 1979-1979, 1982-1986, 1990-2004, 2009-2009, 2010-2020	18	1290-H014
N7	1140	H066	Danshui River	24.9894	121.529	748.267	1970-2001, 2004-2004, 2007-2009, 2010-2020	28.9796	1140-H068, 1140-H058, 1140-H048, 1140-H049
N8	1140	H058	Danshui River	25.0787	121.69	199.679	1962-1963, 1965-2002, 2004-2004, 2006-2009, 2010-2020	28.7759	1140-H068
N9	2560	H019	Lanyang River	24.758	121.744	104.798	1985-1992, 1994-1994, 1996-1996, 1998-2009, 2010-2014, 2016-2017, 2019-2019	29.4324	2560-H024 2560-H022
N10	2560	H06	Lanyang River	24.7161	121.772	831.472	1949-1951, 1953-1953, 1955-2009, 2010-2020	27.4861	2560-H024, 2560-H022, 2560-H019
N11	2420	H024	Hualian River	23.9227	121.6	1487.53	1969-1979, 1981-1992, 1994-1995, 1998-2006, 2011-2020	14.9792	2420-H036, 2420-H037, 2420-H043, 2420-H018, 2420-H019
N12	2370	H017	Xiuguluan River	23.485	121.405	1512.93	1969-1979, 1981-1982, 1984-1992, 1994-2008, 2010-2020	15.5714	2370-H022, 2370-H004, 2370-H016, 2370-H018, 2370-H019
Additional stations used to compute post-Morakot trends in sediment discharge
	WRA basin ID	WRA station ID	River name	Latitude (°N)	Longitude (°E)	Drainage area (km^2)	Monitoring period (*)	Average C measurements/yr (***)	Upstream stations (****)
	1140	H048	Danshui River	24.9345	121.374	126.687	1974-2004, 2007-2009, 2011-2020	30.4889	1140-H068, 1140-H058
	1140	H049	Danshui River	24.933	121.399	52.0064	1974-2004, 2007-2009, 2010-2020	29.5435	1140-H068, 1140-H058, 1140-H048
	1140	H068	Danshui River	24.9152	121.547	646.222	1973-1996, 2004-2004, 2006-2009, 2010-2020	27.2439
	1140	H082	Danshui River	24.9798	121.553	111.394	1987-2004, 2006-2009, 2010-2020	29.3529	1140-H068, 1140-H058, 1140-H048, 1140-H049
	1300	H013	Touqian River	24.7029	121.181	147.735	1972-1974, 1977-1977, 1982-1982, 1991-2005, 2009-2009, 2010-2020	20.4324
	2500	H05	Heping River	24.3621	121.656	274.134	1986-1994, 1996-2001, 2004-2005, 2009-2009, 2011-2017	16.5
	2560	H017	Lanyang River	24.5783	121.492	261.463	1974-2009, 2010-2011, 2013-2020	29.5745	2560-H024, 2560-H022
	2560	H022	Lanyang River	24.6371	121.613	77.0839	2011-2020	29	2560-H024
	1340	H08	Zhonggang River	24.6757	120.949	296.622	1985-1986, 1988-2005, 2007-2007, 2009-2009, 2010-2020	23.3824
	1350	H01	Houlong River	24.4622	120.862	243.689	1961-1964, 1966-1966, 1968-1974, 1978-1978, 1982-1982, 1989-2005, 2009-2009, 2010-2020	17.3542
	1350	H017	Houlong River	24.4285	120.865	104.503	2009-2009, 2010-2020	25.2308
	1400	H09	Daan River	24.3424	120.738	631.466	1966-1966, 1968-1979, 1981-2003, 2005-2009, 2010-2011, 2014-2020	23.2745	1400-H015, 1400-H012
	1400	H012	Daan River	24.3349	120.934	43.2946	1982-2009, 2010-2011, 2014-2015, 2017-2020	27.2973
	1400	H015	Daan River	24.3578	120.947	441.02	1991-2009, 2010-2011, 2014-2020	26.7586	1400-H038, 1400-H030, 1400-H028, 1400-H025
	1430	H025	Wu River	24.1059	120.582	2019.29	1964-1964, 1967-1988, 1990-2003, 2005-2006, 2011-2011, 2014-2020	27.8431	1430-H038, 1430-H030, 1430-H028
	1430	H028	Wu River	24.092	120.643	320.758	1970-1977, 1990-2003, 2005-2006, 2008-2009, 2010-2011, 2014-2020	22.9744	1430-H038, 1430-H030
	1430	H030	Wu River	24.0089	120.696	1044.99	1980-1999, 2002-2003, 2006-2006, 2009-2009, 2010-2011, 2014-2020	26.6389	1430-H038
	1430	H037	Wu River	23.9836	120.913	335	1981-1987, 1989-2003, 2005-2009, 2010-2011, 2014-2020	28.0513	1430-H038
	1430	H038	Wu River	23.9421	120.674	253.708	1985-2003, 2005-2009, 2010-2011, 2014-2020	27.9143
	1510	H050	Zhuoshui River	23.7791	120.709	82.5755	2004-2009, 2010-2020	21.3889	1510-H075, 1510-H063, 1510-H079
	1510	H057	Zhuoshui River	23.7876	120.636	2880.66	1987-2009, 2010-2020	28.0857	1510-H075, 1510-H063, 1510-H079, 1510-H050
	1510	H063	Zhuoshui River	23.807	120.841	2080.58	1994-2009, 2010-2020	28.75	1510-H075
	1510	H079	Zhuoshui River	23.6734	120.665	357.441	2011-2020	27.9091	1510-H075, 1510-H063, 1510-H079
	1540	H09	Beigang River	23.5628	120.301	597.241	1949-1949, 1952-1957, 1960-1992, 1994-2003, 2006-2009, 2010-2020	15.5217	1540-H014
	1540	H029	Beigang River	23.6814	120.419	252.324	1984-1987, 1989-1992, 1994-2003, 2006-2009, 2010-2020	19.0278	1540-H014
	1540	H014	Beigang River	23.6087	120.399	136.145	1961-1961, 1972-1972, 1974-1979, 1981-1981, 1983-1986, 1989-1992, 1994-2003, 2005-2009, 2010-2020	15.1875
	1550	H012	Pozi River	23.4979	120.303	234.387	1994-2003, 2005-2009, 2010-2020	21.6429	1550-H017
	1580	H08	Bazhang River	23.4289	120.45	101.524	1970-1979, 1981-1987, 1992-1992, 1994-1996, 1998-1998, 2000-2009, 2010-2012, 2014-2014, 2017-2020	13.8864	1580-H001, 1580-H007
	1590	H012	Jishui River	23.2959	120.313	223.085	1959-1979, 1981-1992, 1994-2009, 2010-2020	16.2063
	1630	H05	Zengwen River	23.1178	120.458	158.29	1959-1967, 1969-1994, 1996-2009, 2011-2020	17.5738	1510-H020, 1510-H013
	1630	H013	Zengwen River	23.0668	120.381	119.227	1971-1979, 1981-1994, 1996-2009, 2011-2020	18.52	1510-H020
	1630	H018	Zengwen River	23.1156	120.384	839.608	2000-2001, 2006-2009, 2011-2020	25.2222	1510-H020, 1510-H013
	1630	H020	Zengwen River	23.1228	120.453	617.792	2004-2009, 2011-2020	26.7222
	1650	H06	Yanshui River	23.0583	120.277	141.256	1973-1979, 1981-1992, 1996-1996, 1998-1998, 2000-2009, 2011-2020	18.3478	1510-H09
	1660	H09	Erren River	22.8895	120.339	174.228	1971-1981, 1990-1994, 1996-2009, 2010-2020	20.5581
	1660	H010	Erren River	22.8757	120.362	138.035	1982-1994, 1996-2009, 2010-2020	21.575	1510-H058
	1730	H058	Gaoping River	22.9903	120.551	507.517	2008-2009, 2011-2020	26.3846
	2200	H07	Beinan River	22.8984	121.085	462.496	1955-1957, 1959-2009, 2011-2020	24.7273	2200-H020, 2200-H027, 2200-H022
	2200	H021	Beinan River	23.1335	121.119	293.409	2000-2009, 2011-2017, 2020	24.7222	2200-H020, 2200-H027
	2200	H027	Beinan River	22.8761	121.056	427.516	2011-2018	9.5714	2200-H020
	2370	H04	Xiuguluan River	23.2994	121.264	444.831	1985-1985, 1987-1992, 1994-2001, 2003-2008, 2011-2020	16	2370-H022
	2370	H016	Xiuguluan River	23.4274	121.311	246.319	1969-1977, 1979-1979, 1984-1986, 1990-1992, 1994-2007, 2011-2015, 2017-2020	9.1739	2370-H022, 2370-H004
	2370	H018	Xiuguluan River	23.3229	121.328	986.13	1981-1982, 1984-1992, 1994-2008, 2011-2020	10.6154	2370-H022, 2370-H04 2370-H016
	2370	H019	Xiuguluan River	23.5717	121.367	87.997	1984-1984, 1991-1991, 2007-2007, 2015-2015	9.0625	2420-H036, 2420-H037, 2420-H043
	2420	H018	Hualian River	23.8123	121.452	207.24	1960-1962, 1964-1964, 1968-1979, 1981-1981, 1984-1992, 1994-1995, 1999-2001, 2003-2006, 2011-2011, 2013-2013, 2015-2015, 2018-2018	8.1731	2420-H036, 2420-H037, 2420-H043, 2420-H018
	2420	H019	Hualian River	23.9563	121.505	420.64	1960-1964, 1968-1979, 1981-1992, 1994-1995, 1997-1997, 2000-2001, 2003-2006, 2008-2008, 2011-2011, 2013-2013, 2015-2015, 2017-2020	13.2424	2420-H036
	2420	H036	Hualian River	23.6875	121.409	133.532	1982-1992, 1994-1995, 2000-2006, 2011-2019, 2020	7.9655	2420-H036
	2420	H037	Hualian River	23.7204	121.427	238.758	1981-1982, 1984-1992, 1994-1994, 1999-2001, 2003-2006, 2011-2013, 2015-2015, 2018-2020	10.7	2420-H036, 2420-H043
	2420	H043	Hualian River	23.7321	121.486	555.681	2001-2006, 2011-2013	27.2979	2500-H05, 2500-H04
	2500	H03	Heping River	24.3245	121.743	558.326	1975-2009, 2010-2020	19.6296
	1760	H04	Agongdian River	22.4639	120.542	304.159	1961-1992, 1994-2009, 2010-2014	17.4038
	2170	H01	Zhiben River	22.6961	121.014	157.816	1961-1975, 1979-1988, 1990-2009, 2011-2015	23.375
	2180	H02	Lijia River	22.7629	121.041	142.438	1999-2009, 2011-2015
Additional stations used to compute basin-averaged erosion rates, but without adequate data to compute post-Morakot trends in sediment discharge
	WRA basin ID	WRA station ID	River name	Latitude (°N)	Longitude (°E)	Drainage area (km^2)	Monitoring period (*)	Average C measurements/yr (***)	Upstream stations (****)
	2560	H023	Lanyang River	24.684	121.745	69.7178	2020	10.6667	2560-H024, 2560-H022, 2560-H019
	2560	H024	Lanyang River	24.6424	121.567	450.509	2012-2020	32.9
	1420	H058	Dajia River	24.1716	120.836	966.21	2014-2020	28.875
	1550	H017	Pozi River	23.5135	120.443	148.272	2017-2020	30.6
	1580	H021	Bazhang River	23.3284	120.253	433.871	2017-2020	30.2	1580-H008, 1580-H007
	1630	H025	Zengwen River	23.1557	120.338	1012.82	2012-2020	29.7	1630-H020, 1630-H013, 1630-H018, 1630-H030
	1730	H069	Gaoping River	22.8801	120.648	368.984	2012-2018, 2020-2020	26.2	1740-H058, 1730-H036
	1730	H070	Gaoping River	22.9955	120.638	878.555	2012-2020	29.5	1739-H08
	1740	H08	Donggang River	22.5419	120.505	333.507	2014-2020	29.5
	2460	H05	Liwu River	24.1772	121.5	433.444	1986-1999, 2005-2005, 2013-2015, 2017-2017	5.5
* "Monitoring period" is the time period we analyzed with adequate discharge and suspended sediment measurements (at least five non-zero sediment discharge measurements per year).
** Average number of suspended sediment concentration measurements (C > 0) per year during monitoring period.
*** List of upstream monitoring stations. These are used to compute subcatchment erosion rates in nested catchments, as described in the main text.

## Sheet: Table S2. Averages
Table S2. Centered discharge, average pre-Morakot rating curve parameters, basin-averaged landslide intensity, and characteristic decay time of ã.
Focus stations (Figure 1 in the main text)
Focus station ID	WRA basin ID	WRA station ID	center(log(Q)) (*)	ã_pre (ppm) (**)	b_pre	Landslide intensity I_L (m^3 / m^2)	τ_ã (years) (***)	Lower bound τ_ã (years)	Upper bound τ_ã max (years)
Southern stations
S1	1730	H043	2.2121	570.189	0.690018	0.272263	5.76172	4.7611	7.29486
S2	1730	H036	1.0281	293.22	0.590278	0.196038	5.68209	4.55959	7.53777
S3	1580	H07	0.2829	346.88	0.801418	0.099028	8.83689	7.52454	10.7037
S4	1580	H01	0.5961	468.884	0.821511	0.136902	6.96224	5.59579	9.21163
S5	1510	H049	1.3831	1773.38	1.47695	0.068238	7.00055	5.69106	9.09275
S6	1510	H075	2.0325	5579.56	1.09648	0.000442	8.96025	7.69766	10.7183
S7	1510	H071	1.7935	2109.2	0.832137	0.016355	7.06964	6.37668	7.93157
S8	2200	H020	1.2639	180.119	1.03169	0.049484	97.6681	11.389	Inf
S9	2200	H022	1.5176	549.903	0.758306	0.038939	7.93063	5.57126	13.7562
S10	2200	H011	1.8105	1073.08	0.91641	0.035858	192.612	12.1425	Inf
S11	1850	H04	0.0942	98.9992	0.210343	0.003618	4.36327	3.19125	6.89583
S12	1740	H02	1.173	133.34	0.518734	0.000485	5.41754	4.02656	8.27677
Northern stations
N1	1430	H032	1.2868	142.051	0.957684	4e-06
N2	1350	H012	1.2437	295.641	0.559233	0	11.3648	6.74443	36.0858
N3	1340	H09	0.781	85.2137	0.475048	0	14.6202	8.73669	44.7683
N4	1300	H014	1.0531	164.201	0.892164	0	73.1625	9.68316	Inf
N5	1300	H017	0.7204	132.432	0.289682	1.7e-05	32.778	11.1365	Inf
N6	1290	H02	0.6979	150.695	0.378819	0
N7	1140	H066	1.3319	164.698	0.092881	4e-06	22.1227	13.4289	62.7396
N8	1140	H058	1.0645	160.101	0.202905	0
N9	2560	H019	0.7784	187.856	0.4074	0
N10	2560	H06	1.919	1493.75	0.7888	0
N11	2420	H024	2.2437	2126.63	1.06881	0	15.3779	7.13543	Inf
N12	2370	H017	2.1753	1173.99	0.940232	3.4e-05
Additional stations used to compute post-Morakot trends in sediment discharge
	WRA basin ID	WRA station ID	center(log(Q)) (*)	ã_pre (ppm) (**)	b_pre	Landslide intensity I_L (m^3 / m^2)	τ_ã (years) (***)	Lower bound τ_ã (years)	Upper bound τ_ã max (years)
	1140	H048	2.08078	79.6815	0.294	0
	1140	H049	1.33317	60.3767	0.3203	0
	1140	H068	3.95748	55.8162	0.2987	3e-06
	1140	H082	2.50896	206.342	0.4527	0	20.2849	13.7923	38.327
	1300	H013	2.14616	80.8314	0.5789	0	36.8724	8.53319	inf
	2500	H05	2.23551	1345.14	0.8516	0
	2560	H017	2.7326	1013.16	1.309	0	99.5634	13.1066	inf
	2560	H022	1.39105	no data	no data	0
	1340	H08	1.54422	157.468	0.4333	0	10.9091	6.93415	25.5631
	1350	H01	2.50632	236.863	0.7348	0	14.6528	8.49117	53.4104
	1350	H017	1.99669	58.7736	0.474	0	622.177	22.5354	inf
	1400	H09	2.14892	210.968	0.7048	0.000109
	1400	H012	0.945863	102.121	0.7232	0
	1400	H015	3.19105	206.641	0.8716	0.000156
	1430	H025	4.8059	300.753	0.8313	4.6e-05
	1430	H028	3.48529	499.641	0.6086	0
	1430	H030	3.21937	151.75	0.6439	8.8e-05
	1430	H037	3.01104	168.904	0.7598	6.4e-05
	1430	H038	2.73019	382.516	0.7026	0
	1510	H050	0.929849	194.565	0.8303	0	8.43639	6.30483	12.7454
	1510	H057	4.52501	2064.05	0.8987	0.016704	10.8652	6.66177	29.4434
	1510	H063	4.99661	6453.83	1.0536	0.012447	15.0995	11.4761	22.0666
	1510	H079	2.83506	no data	no data	0.061896	3.75598	3.18682	4.57265
	1540	H09	2.31218	540.542	0.5603	0	13.6543	10.0159	21.4444
	1540	H029	2.67542	591.645	0.8258	0	14.6989	10.6255	23.8371
	1540	H014	0.552327	142.854	0.6167	0	12.4409	8.79053	21.2761
	1550	H012	2.60017	373.808	0.7121	0.004883	13.5512	9.07635	26.7294
	1580	H08	0.768782	268.558	0.5459	0.011281	12.0059	6.43911	88.6216
	1590	H012	2.02614	411.356	0.8801	9.7e-05	13.8765	10.0888	22.2177
	1630	H05	0.573749	486.7	0.5676	0.063072
	1630	H013	0.643872	1911.7	0.8689	0
	1630	H018	2.4346	550.828	0.3517	0.093257
	1630	H020	1.88189	325.784	0.1936	0.110581
	1650	H06	1.43208	385.48	0.5206	0
	1660	H09	1.46558	1463.6	0.8793	0
	1660	H010	1.01525	2245.32	0.7813	0
	1730	H058	2.3223	131.028	0.7207	0.411751	5.74209	4.19728	9.08631
	2200	H07	3.37872	1158.82	1.0193	0.053499	54.75	15.4417	inf
	2200	H021	3.34995	479.768	0.8542	0.037315	3.19522	1.9607	8.62714
	2200	H027	2.01417	no data	no data	0.057864
	2370	H04	3.30254	1284.48	0.9618	9.7e-05	254.531	14.5322	inf
	2370	H016	3.3243	1803.05	0.58	0	52.3591	22.1062	inf
	2370	H018	3.71402	704.451	0.9324	5.3e-05
	2370	H019	1.52148	277.166	0.7717	0
	2420	H018	2.0757	3058.76	0.6523	0	7.79619	5.93146	11.371
	2420	H019	3.12971	1435.45	0.9236	0	16.5406	8.621	203.29
	2420	H036	2.94891	2044.95	0.9557	0
	2420	H037	2.16062	907.876	0.679	0	17.4276	8.05909	inf
	2420	H043	3.43894	757.625	0.8032	0
	2500	H03	3.61086	2700.51	1.0128	0
	1760	H04	1.87639	170.654	0.4574	0.360524	4.89182	2.14705	inf
	2170	H01	2.31153	305.969	0.711	0.020953	8.80327	2.92183	inf
	2180	H02	1.62258	450.694	0.6316	0.001217
Additional stations used to compute basin-averaged erosion rates, but without adequate data to compute post-Morakot trends in sediment discharge
	WRA basin ID	WRA station ID	center(log(Q)) (*)	ã_pre (ppm) (**)	b_pre	Landslide intensity I_L (m^3 / m^2)	τ_ã (years) (***)	Lower bound τ_ã (years)	Upper bound τ_ã max (years)
	2560	H023	1.22006	no data	no data	0
	2560	H024	2.27498	no data	no data	0
	1420	H058	2.45663	no data	no data	2.2e-05
	1550	H017	1.36809	no data	no data	0.007719
	1580	H021	2.75169	no data	no data	0.02908
	1630	H025	2.37794	no data	no data	0.077309
	1730	H069	1.00686	no data	no data	0.363735
	1730	H070	1.62119	no data	no data	0.378727
	1740	H08	3.42578	no data	no data	0.000252
	2460	H05	3.54629	2387.82	0.7842	0
* Q has units of cubic meters per second.
** ã_pre is the rating curve parameter evaluated at the centered discharge.
*** τ_ã is the characteristic decay time of ã.

## Sheet: Table S3. a
Table S3. Annual estimates of the rating curve parameter ã (ppm).
Focus stations (Figure 1 in the main text)
Focus station ID	WRA basin ID	WRA station ID	1948	1949	1950	1951	1952	1953	1954	1955	1956	1957	1958	1959	1960	1961	1962	1963	1964	1965	1966	1967	1968	1969	1970	1971	1972	1973	1974	1975	1976	1977	1978	1979	1980	1981	1982	1983	1984	1985	1986	1987	1988	1989	1990	1991	1992	1993	1994
Southern stations
S1	1730	H043																																												211.832	349.264	529.91	126.12
S2	1730	H036																		73.1591	293.305	109.574	150.436	190.02	233.504	216.252	333.918	101.134	285.372	86.8813	65.4728	63.8274	70.9663	13.6954	609.345	109.408	40.4433	68.5536	69.6789	5.1752	22.7469	180.391	74.6985	22.5302	60.4325	10.6682			167.788
S3	1580	H07																							281.65	245.356	31.7853	143.616	128.639	16.7224	116.972	42.1292	99.4052	99.9759		300.556		343.368	752.861	499.863		245.038		1167.6	98.3193	594.932	571.372		198.834
S4	1580	H01																			302.479			351.345	528.415		171.771	205.25	133.758	141.668	225.557	213.855	267.079		286.929	1535.64	2147.95	496.987			669.987	293.881	322.926	1780.43			1035.98		116.7
S5	1510	H049																									345.986	169.898	658.586	264.073	176.695	133.448	81.4377	397.379	641.207	675.282	143.735	542.192	1743.48	707.384	1910.72	2020.16	1664.48	2245.61	1306.87	4384.14	1487.66	2676.5	2794.78
S6	1510	H075
S7	1510	H071
S8	2200	H020																																26.9528	115.309	115.163	203.185	214.277	174.866	232.287	81.5516	190.784	128.553	92.6073	110.07	107.881	95.4381	221.886	125.104
S9	2200	H022
S10	2200	H011	583.431	171.267	38.9178	6.6173	63.986	320.621	279.098	1018.38	385.095	92.8203	51.7389	43.467		733.197	747.212	441.395	187.04	247.685	709.876	297.431	221.424	752.928	398.833	677.824	404.841	589.62	2002.18	663.989	622.15	581.22	422.663	124.292	686.214	608.083	599.283	833.764	483.621	522.801	248.879	714.913	809.61	527.266	312.699	437.79	456.98	839.704	784.832
S11	1850	H04
S12	1740	H02																			135.824	116.67	93.1238	124.362	105.731	90.7038	66.9107	53.1137	55.7214	110.069	59.0711	108.549	77.4275	97.4345	97.2923	122.511	82.5629	93.7959	73.8612	76.5968	89.6785	154.631	95.4258	109.548	125.779	90.5891	134.177		136.226
Northern stations
N1	1430	H032																													110.579	64.478	27.2653	26.5523	83.4539	132.984	122.028	86.7673	41.7335	55.1153	55.7299	82.8102	63.2808	108.287	115.484	183.642	73.7785	108.848	107.881
N2	1350	H012																																													138.649	183.632	302.305
N3	1340	H09																																							200.132		63.5538		583.354	55.8429	101.741	145.128	121.681
N4	1300	H014																								534.954	182.496	284.037	111.767															16.1056	121.808	72.159	79.6896	106.607	201.952
N5	1300	H017																																											311.544	293.088	120.248	120.261	175.183
N6	1290	H02																							184.419	242.147		46.741	49196.5	37.8294				67.3958			45.9781	68.4772		158.682						160.302	108.135	101.95	103.966
N7	1140	H066																							72.2745	79.798	86.5165	88.0742	120.618	132.633	81.9669	67.0954	62.4583	57.9758	76.5974	91.8703	93.36		70.7579	83.4347	65.1996	102.428	83.6289	92.2911	77.7345	136.481	178.957	154.383	182.371
N8	1140	H058															61.6195	107.132		67.8022	74.3479	63.4864	72.2255	32.7158	13.4739	10.63	25.7889	87.3912	7855.59	2003.29	149.921	111.055	110.62	93.3494	233.569	144.642	147.343		111.693	69.4927	85.7584	198.622	138.961	81.0146	123.583	83.2237	159.626	66.1368	79.682
N9	2560	H019																																						62.116	66.2893	54.1287	46.3133	93.8873	144.204	121.049	74.9441		42.1677
N10	2560	H06		2252.43	379.278	771.272		454.393	597.055	649.483	364.665	364.613			1380.67	1406.39	1125.35	3052.24	1594.21	948.308	498.847	604.019	661.399	82.5363	45.9477	24.1692	188.522	700.716	282.487	237.824	138.707	1607.52	1699.5	1377.58	1295.9	1327.62	1134.97	917.473	1527.76	2506.71	1148.63	1404.54	883.388	3771.71	2615.01	2708.93	4355.9	1214.81	3491.57
N11	2420	H024																						596.808	3020.87	1278.61	1240.23	1155.23	1717.55	1507	1110.99	1609.24				1043.69		1915.82	3485.43	2814.6	3814.34	2232.14	2869.75	3430.41	4111.2	4448.5	2452.47		747.797
N12	2370	H017																						1541.28	759.349	608.119	370.15	788.04	839.819	872.274		832.919	557.602			672.763	724.413		307.439	90.9737	328.873	2057.72	1814.68	2984.45	1452.46	2357.66	1086.23		757.809
Additional stations used to compute post-Morakot trends in sediment discharge
	WRA basin ID	WRA station ID	1948	1949	1950	1951	1952	1953	1954	1955	1956	1957	1958	1959	1960	1961	1962	1963	1964	1965	1966	1967	1968	1969	1970	1971	1972	1973	1974	1975	1976	1977	1978	1979	1980	1981	1982	1983	1984	1985	1986	1987	1988	1989	1990	1991	1992	1993	1994
	1140	H048																											115.77	77.48	130.53	83.15	63.04	63.33	72.5	71.59	184.9		53.1	83.92	36.53	111.75	42.33	89.68	89.33	71.95	68.92	64.43	68.05
	1140	H049																											113.64	67.19	127.23	70.79	47.31	61.1	54.63	41.29	69.15	28.96	54.38	58.7	27.54	88.68	38.06	84.03	81.46	96.66	56.74	56.3	54.78
	1140	H068																										212.11	165.61		27.07	41.29	28.42	39.33	32.8	43.91	41.85		47.73	44.91	27	54.52	44.93	20.32	26.92	87.31	41.67	51.57	102.42
	1140	H082																																								157.57	38.67	176.43	64.15	144.35	157.73	175.13	140.32
	1300	H013																								44.64			41.37	186.22		79.2					38.33							52.63		51.12	36.84	52.87	44.98
	2500	H05																																							662.97	651.03	1510.71	2135.08	1458.35	1025.97	686.55	1079.41	912.65
	2560	H017																											123.69	242.21	561.94	1886.88	2759.51	486.02	1012.79	785.21	250.31	264.4	353.16	679.73	1929.3	1297.86	942.17	807.42	1852.07	2731.85	1821.15	435.32	1505.68
	2560	H022
	1340	H08																																							98.34		935.19	108.64	389.81	58.6	167.76	369.92	198.14
	1350	H01																		1104.19	225.15		21.57	946.42	224.03	283.06	139						451.94				146.88							56.16		46.39	40.5	51.21	131.59
	1350	H017
	1400	H09																					477.07	577.29	386.28	573.11	542.23	112.75		106.87	325.35	111.01	412.55			304.55	116.93	81.17	91.9	65.01	84.92	84.2	65.36	62.16	85.09	96.54	121.79	92.11	221.56
	1400	H012																																			37.26	13.2	17.9	16.7	31.82	29.89	31.6	34.83	58.73	59.93	78.73	42.94	75.43
	1400	H015																																												79.18	157.21	83.3	164.98
	1430	H025																	595.03			189.22	232.03	399.88	274.88	253.02	237.39	578.49	348.64	166.75	214.94	312.59	383.25	333.96	278.82	376.93	128.87	348.32	249.95	135.34	100.84	136.3	123.9	122.02	256.07	285.9	206.59	205.27	256.42
	1430	H028																						605.43	1373.43	2013.72	1351.41	681.14	783.44	391.48	1016.95	1560.69	1013.19												673.46	881.93	370.61	432.16	724.64
	1430	H030																																	74.76	182.54	158.1	94.63	79.91	79.33	55.55	46.03	52.1	100.77	56.26	93.03	79.08	82.16	100.44
	1430	H037																																		185.43	283.62	240.41	139.94	70.94	58.91	61.28		132.46	105.97	94.56	53.78	48.53	109.94
	1430	H038																																						42.56	41.5	115.3	233.03	179.97	309.83	474.68	207.81	207.72	451.22
	1510	H050
	1510	H057																																								857.37	985.96	1520.42	3016.09	3970.98	2333.89	794.68	942.22
	1510	H063																																															3332.39
	1510	H079
	1540	H09		531.02			761.65	1664.7	1057.75	1281.16	750.22	41.61				427.25	1623.27	332.03	314.31	68.26	405.23		300.84	310.92	318.94		324.77	105.23	439.84	198.68	682.41	2380.3	782.94	231.03	265.48		95.99		433.57	216.93	1425.65	308.4	479.79	766.94	1094.8	213.44	529.15	403.43	273.1
	1540	H029																																					274.79		136.16	470.92	421.16	557.33	292.44	339.02	1640.67		634.61
	1540	H014														247.42											199.16	93.92	114.5			282.78	138.32	116.84		122.45	25.24		20.4	43.74		138.01		126.85	9.63	80.71			126.06
	1550	H012																																															546.69
	1580	H08																							133.11		15.36		37.24	15.01	65.89	37.59	105.18	21.6		17.98		77.83	64.06		276.76	187.68	648.63		1331.57		673.13		152.42
	1590	H012												836.6		652.56		1561.81	722.19	1286.19	664.65	316.08	1608.7	586.23	696.14	616.55	599.9	502.82	335.63	746.56	297.87	729.44	291.24	172.69		396.11	299	127.69	293.91	249.94	180.33	158.42	189.33	453.7	264.89	358.29	1539.26	812.45	968.71
	1630	H05												172.11	136.39	223.33	231.09	305.67			53.91			194.03	179.62	164.88	75.83	292.1	165.83	59.89	38.02	61.54	77.61	106.22		313.94	225.45	392.46	175.2	392.58	719.47	625.17	104.47			61.08	217.67
	1630	H013																								1462.14	805.27	1251.59	2198.42	931.27	219.2	723.21	1301.86	803.86	283.75	986.92	1184.74	2042.38	2094.73	3851.29	376.52	1599.26	3717.62		111.47	1624.41	1384.58		3114.06
	1630	H018
	1630	H020
	1650	H06																										258.53	149.33	223.81	234.05	236.28	584.76	81.21	140.49		485.18	133.49	290.35	484.94	225.86	1448.51	206.88	44.17		92.92	91.12
	1660	H09																								1503.2	875.8	1211.65	1829.03	1861.95	2073.55	1534.25		996.37	2010.99	1752.42									103.01	731.35	671.04		1139
	1660	H010																																			473.59	2477.8	2832.6	1043.06	1357.91	3247.87	1563.58		335.69	1048.97	328.68		2303.67
	1730	H058
	2200	H07								109.04	229.79	102.87	68.44	41.17		774.26	791.27	304.99	395.01	159.74	124.21	164.56	505.27	1126.29	432.47	847.01	376	418.54	3040.53	966.92	669.95	497.44	562.88	174.84	758.08	661.55	438.4	923.83	601.42	382.75	350.38	1179.23	1257.17	679.24	994.07	989.84	634.43	629	857.67
	2200	H021
	2200	H027
	2370	H04																																						461.52			1312.56	3392.4	1113.36	2271.3	411.01		898.11
	2370	H016																						42.94	209.86			1522.09	1118.9	289.56		467.76							225.03						1119.1	2720.19	3596.46		897.9
	2370	H018																																		608.63	377.9			157.43	192.26		518.44	2333.39	821.74	1552.1	214.21		306.24
	2370	H019																																											1194.94
	2420	H018															137.22							539.95	4499.32	2063.22	3637.98	2054.47	1996.99	2357.4	1354.33	3522.88	1765.77	1730.57		6114.69			4580.59	5774.05	2638.05	4204.51	2811.31	2746.2	6676.1	6206.14	2658.27		4765.13
	2420	H019														1178.27	952.01	4703.83	230.96				2357.16			477.29		1335.23	2189.86	449.24	699.86	1221.29	773.03			1875.62	1085.62	319.03	1007.67	468.34		3413.94		601.03	571.23	3572.6	2518.02		3799.08
	2420	H036																																			2915.31	3187.6	1800.92	2988.97	4799.91	1422.7		2940.31	2777.64	5059.94	2704.46		1998.37
	2420	H037																																		1894.5			115.92	77.72		190.46		78.54	699.21	343.4	1130.47		502.39
	2420	H043
	2500	H03																												1776.83	1637.08	1408.82	1144.76	2083.24	4211.24	1289.41		3441.29	1165.46	303.24	817.78	1341.7	2096.6	3831.56	2381.03	8569.78	3949.33	3389.34	1885.77
	1760	H04														27.09	322.39	150.26	250.49	230.55	106.19	132.72	112.46	121.69	98.81	81.52	137.81	24.1	41.46	28.51	73.63	35.55	51.13	138.51	138.75	65.27	64.37	31	59.81	54.42	67.67	61.93	113.5	41.59	298.12	15.54	173.48		173.6
	2170	H01															188.49	83.38	69.56	60.73	57.19	58.61	336.18	409.76	148.79	108.13	166.17	297.77	1474.75	308.45				76.33	175.05	195.06	294.58	230.61	272.26	101.98	120.65	669	276.99	238.6	195.59	25.45	115.64	242.31	105.73
	2180	H02
Additional stations used to compute basin-averaged erosion rates, but without adequate data to compute post-Morakot trends in sediment discharge
	WRA basin ID	WRA station ID	1948	1949	1950	1951	1952	1953	1954	1955	1956	1957	1958	1959	1960	1961	1962	1963	1964	1965	1966	1967	1968	1969	1970	1971	1972	1973	1974	1975	1976	1977	1978	1979	1980	1981	1982	1983	1984	1985	1986	1987	1988	1989	1990	1991	1992	1993	1994
43	2560	H023
44	2560	H024
86	1420	H058
143	1550	H017
153	1580	H021
166	1630	H025
207	1730	H069
208	1730	H070
220	1740	H08
256	2460	H05																																							706.13	898.54	1007.31	1573.25	3392.29	3722.06	1424.85		1776.47
[truncated: 27 more columns]

## Sheet: Table S4. b
Table S4. Annual estimates of the rating curve parameter b (unitless).
Focus stations (Figure 1 in the main text)
Focus station ID	WRA basin ID	WRA station ID	1948	1949	1950	1951	1952	1953	1954	1955	1956	1957	1958	1959	1960	1961	1962	1963	1964	1965	1966	1967	1968	1969	1970	1971	1972	1973	1974	1975	1976	1977	1978	1979	1980	1981	1982	1983	1984	1985	1986	1987	1988	1989	1990	1991	1992	1993	1994
Southern stations
S1	1730	H043																																												1.0229	0.8508	0.5027	1.1345
S2	1730	H036																		0.9719	0.4481	0.2514	0.561	0.4657	0.5229	0.5451	0.6729	0.8904	0.5786	0.7916	0.943	0.7405	0.4674	1.3599	0.8173	0.7695	1.0565	0.7298	0.8601	1.5236	1.0617	0.7034	0.9625	1.2871	0.9332	1.3118			0.5764
S3	1580	H07																							0.8163	0.7029	1.0446	0.6455	0.7425	1.3429	0.8351	0.874	0.8893	0.8393		0.9165		0.989	0.5757	0.6537		0.7569		0.3711	1.1217	0.7477	0.7746		1.1368
S4	1580	H01																			0.8856			0.6361	1.1051		1.0889	0.9872	1.3271	0.9839	0.9585	0.9689	0.8574		1.0071	0.4407	0.663	0.9639			0.6297	1.1114	0.9733	0.394			0.2963		0.8892
S5	1510	H049																									1.5129	0.9371	1.4103	0.7294	1.1965	1.5979	1.2335	1.424	1.4325	1.1744	1.7822	2.2718	2.3335	2.1278	1.9018	2.3557	1.7716	1.4134	2.0947	2.2671	2.1243	2.3421	1.359
S6	1510	H075
S7	1510	H071
S8	2200	H020																																1.9186	1.7598	1.1726	0.7905	0.8408	0.8473	0.6379	1.1786	1.2207	1.2345	1.4137	1.0136	1.2186	0.9804	0.5125	1.0627
S9	2200	H022
S10	2200	H011	0.1036	0.623	0.301	0.2246	0.4199	0.8813	0.682	0.2346	0.9383	1.2687	0.7047	1.0327		0.8462	0.9736	1.3973	1.3069	1.479	0.9914	1.2901	1.2658	0.9172	1.5455	1.1198	1.2405	1.1333	0.9748	1.1347	1.0416	1.0867	1.0044	1.6285	1.2773	0.9018	0.8943	0.3145	1.0083	1.3806	1.436	1.1162	0.992	1.5945	1.3271	1.1472	1.186	0.8687	0.9099
S11	1850	H04
S12	1740	H02																			0.6068	0.4984	0.6147	0.7542	0.4452	0.7562	0.7634	0.7777	0.963	0.6763	1.06	0.8608	1.2453	0.7082	0.45	0.6384	0.7343	0.6536	0.8214	0.481	0.6298	0.6722	0.7465	0.9223	0.7448	0.6802	0.4523		0.3788
Northern stations
N1	1430	H032																													1.2625	0.5655	0.9529	1.1794	1.5555	1.3791	1.211	1.715	1.3971	1.1798	1.2304	0.5674	0.316	0.5699	0.8824	1.2587	1.0135	1.1195	1.3008
N2	1350	H012																																													0.45	0.2951	0.3212
N3	1340	H09																																							0.4		1.4258		0.385	0.375	0.1316	0.3859	0.3826
N4	1300	H014																								0.9571	2.2275	1.3167	1.7363															1.3599	0.7561	0.4557	0.3878	0.3565	1.0045
N5	1300	H017																																											0.4525	0.1739	0.44	0.3252	0.448
N6	1290	H02																							0.8226	0.7115		0.5836	-0.1252	0.6368				0.6918			0.5114	0.1335		0.17						0.7594	0.1184	0.2045	0.0037
N7	1140	H066																							0.6994	0.248	0.0229	0.4077	0.1954	-0.1374	0.2588	-0.0282	0.1195	-0.0178	-0.0101	0.3414	0.3592		0.0801	0.3129	0.0234	0.0225	0.2801	0.5132	0.344	0.3545	0.2711	0.2764	0.2327
N8	1140	H058															0.2119	0.2091		0.2151	0.6603	0.5301	0.7698	0.096	-0.0303	0.4339	0.1618	0.5898	0.2725	0.6361	0.3809	0.5735	0.0334	0.1071	0.059	0.2211	0.156		-0.0189	0.0855	0.1881	0.3658	0.0621	-0.1523	0.0764	-0.0916	0.2587	-0.3198	0.1039
N9	2560	H019																																						0.7323	0.2144	0.5585	0.8558	1.0458	0.2048	0.2589	0.39		1.5303
N10	2560	H06		0.5514	-0.0763	0.4569		0.6435	0.7998	0.5698	0.442	0.1194			1.546	1.4437	1.0872	1.2274	1.055	1.764	1.1353	0.8901	0.654	0.2642	0.068	0.4212	0.3833	1.2675	1.0474	0.9021	0.3302	1.3026	1.0514	1.487	1.3387	1.4741	1.5158	0.9511	1.373	0.9705	1.309	1.0554	0.6249	0.9339	0.1695	0.4236	1.3019	0.7963	1.0847
N11	2420	H024																						1.4426	1.0287	1.2931	2.1306	1.1887	1.0168	1.0105	0.5417	0.9319				1.4724		0.2052	1.0151	0.8256	0.3661	1.3532	0.9253	0.6058	0.3357	0.9487	0.5965		1.5877
N12	2370	H017																						0.8314	0.9357	0.8371	0.9937	0.7474	0.9068	0.8582		1.31	1.0558			1.1799	1.5189		1.3956	2.1019	1.3973	0.6408	0.7882	0.5716	0.7901	0.8716	1.0618		0.9558
Additional stations used to compute post-Morakot trends in sediment discharge
	WRA basin ID	WRA station ID	1948	1949	1950	1951	1952	1953	1954	1955	1956	1957	1958	1959	1960	1961	1962	1963	1964	1965	1966	1967	1968	1969	1970	1971	1972	1973	1974	1975	1976	1977	1978	1979	1980	1981	1982	1983	1984	1985	1986	1987	1988	1989	1990	1991	1992	1993	1994
	1140	H048																											0.4019	-0.4036	0.2949	0.215	0.511	0.0542	0.5512	0.6765	1.036		0.3722	0.7484	-0.0074	0.3387	-0.1743	0.4387	0.5321	0.3253	0.9508	0.4469	0.4338
	1140	H049																											0.6431	-0.2605	0.3137	0.232	0.1974	0.1691	0.3563	0.3679	0.3531	-0.1573	0.2007	0.5642	-0.1146	0.4211	-0.1556	0.4866	0.5211	0.6419	0.4788	0.2546	0.2528
	1140	H068																										1.0086	1.0723		0.4575	0.5066	0.0921	0.0762	0.0945	0.3831	0.6667		0.7572	0.3063	0.0014	0.277	0.2703	-0.0038	0.8209	1.0631	0.7213	0.5605	0.565
	1140	H082																																								0.4285	-0.2979	0.5796	0.0339	0.2634	0.5598	0.2152	0.4789
	1300	H013																								1.4639			0.1943	0.3592		1.2954					0.8345							1.0516		-0.1901	-0.1509	0.1349	0.1152
	2500	H05																																							1.3156	1.4242	0.7741	0.8215	1.1023	1.1879	1.0267	1.2452	0.6148
	2560	H017																											0.2651	1.1119	0.3489	1.1315	1.7899	2.3404	1.875	2.6334	1.9678	1.0142	1.6997	1.2889	2.1664	2.1578	1.2189	2.0424	1.7856	1.2623	1.63	1.2707	2.0779
	2560	H022
	1340	H08																																							0.6184		0.2099	0.5407	0.4454	0.2481	0.4565	0.4285	0.3081
	1350	H01																		0.6146	1.1791		2.0345	0.636	1.3438	1.0025	1.4708						0.527				0.5615							1.1879		0.5557	0.349	0.3492	0.309
	1350	H017
	1400	H09																					0.7038	0.6632	0.8061	1.0652	0.7124	1.0366		1.2139	0.8626	1.2238	0.8496			0.646	0.6451	0.9512	0.594	0.7568	0.8074	0.9194	0.5698	0.5563	0.8991	0.4532	0.3255	0.4394	0.5901
	1400	H012																																			0.3406	0.7075	0.5374	0.6008	0.9772	0.9677	0.5373	0.8817	0.8287	0.5149	0.4054	0.221	0.6428
	1400	H015																																												0.9768	1.2315	0.4434	1.058
	1430	H025																	1.4832			0.6166	0.7195	0.6445	0.5582	0.7874	1.3136	1.7248	1.0264	0.8095	0.83	1.0056	1.0863	1.0387	0.7753	0.8437	1.4454	1.1365	0.7232	1.2417	0.8585	0.8427	0.6764	1.0196	1.1212	1.0508	0.9245	0.7883	0.8288
	1430	H028																						0.4612	1.0689	0.9768	1.0968	1.1144	0.9322	0.3138	0.4544	0.6065	0.0369												0.7634	0.5493	0.6488	1.0311	1.1424
	1430	H030																																	1.0106	0.8942	0.9158	1.4766	0.8714	0.8168	0.5302	0.8494	0.7359	0.5468	0.9736	0.7506	0.6663	0.9447	1.0592
	1430	H037																																		1.221	1.2185	0.8414	1.0755	0.7462	0.3677	0.6957		0.0542	1.1789	0.9553	0.474	0.9855	1.5674
	1430	H038																																						0.7347	1.0374	1.0047	0.5086	0.6166	1.1249	1.1066	0.8972	0.6637	0.8021
	1510	H050
	1510	H057																																								1.0413	0.8056	0.92	0.285	1.6408	0.7899	1.017	1.3084
	1510	H063																																															1.2785
	1510	H079
	1540	H09		0.5716			0.4098	0.0781	0.2663	0.11	1.4298	0.5604				0.5916	0.4057	0.7174	1.1574	1.2566	0.5897		1.1231	1.1959	0.8387		0.6633	1.9337	0.6265	0.6261	0.3091	-0.0237	0.4381	0.7645	0.5495		0.6304		0.1693	1.0505	0.2161	0.5	0.3577	0.4089	0.2397	0.6397	0.3544	0.4702	0.418
	1540	H029																																					1.1447		1.7792	0.681	0.5535	0.667	1.2912	0.8827	0.1966		1.206
	1540	H014														0.1183											0.7245	0.6876	0.6885			0.5462	0.7981	0.5783		0.3746	0.8404		1.2141	0.8917		0.3729		0.6681	1.3486	0.616			0.6904
	1550	H012																																															0.5818
	1580	H08																							1.0113		1.2886		1.1867	1.3398	0.8983	1.1	0.6839	1.1526		1.3417		1.0357	0.9271		0.5427	0.6962	0.3332		0.1756		-0.1248		0.4506
	1590	H012												0.7909		0.3072		0.7744	0.7266	0.8808	0.7818	0.9962	0.6425	0.8595	1.0416	0.7926	0.86	0.8167	1.0129	0.7211	0.8532	0.7574	1.0152	0.7661		0.5994	0.8943	0.7371	1.1054	0.5451	0.873	1.2811	0.9116	0.5537	0.6281	0.7064	0.0044	0.4362	0.3568
	1630	H05												0.7198	0.8391	0.7771	0.583	0.7238			0.8372			0.794	0.9095	0.8527	0.8789	0.6627	0.5961	0.9491	1.1279	0.994	1.0551	0.541		0.4696	0.7855	0.2005	0.3979	0.7804	0.7977	0.788	1.17			1.2089	1.0064
	1630	H013																								0.838	1.1895	1.2074	1.0034	0.9238	0.9517	1.0468	1.0125	0.9841	1.7474	0.7457	1.1402	1.0949	1.0238	1.6256	1.0518	1.2963	0.6096		2.218	0.8988	0.7787		0.6034
	1630	H018
	1630	H020
	1650	H06																										0.5997	0.55	0.5958	0.6624	0.7509	0.4473	0.8615	0.8378		0.5294	0.4329	0.6924	0.6768	0.8907	1.2869	0.7602	0.587		0.4369	0.7617
	1660	H09																								0.9806	1.3701	1.5541	1.233	1.2954	1.0778	1.1883		0.9261	0.9009	0.8761									1.9971	1.2355	1.0171		0.7797
	1660	H010																																			1.4124	1.2005	0.701	1.5514	1.1108	0.803	0.8193		1.6132	1.4121	1.4794		0.5385
	1730	H058
	2200	H07								0.4803	1.9267	1.283	1.4158	1.7677		1.6003	0.9987	1.2642	1.1703	1.4904	1.2701	1.3539	1.1966	1.0626	1.8761	1.0041	1.7346	1.3169	0.7743	1.1907	1.7632	1.554	1.2462	1.8776	1.6851	1.4373	1.1073	1.1268	1.2707	1.4227	1.5427	1.2738	1.1832	1.1522	0.9015	0.954	1.1303	0.9061	0.9609
	2200	H021
	2200	H027
	2370	H04																																						1.2017			0.794	0.3108	1.0028	0.6178	0.9945		1.2491
	2370	H016																						0.8673	0.8751			0.4847	0.7302	1.4412		1.3892							1.3554						1.0665	0.862	0.4689		0.7865
	2370	H018																																		1.0185	1.7611			1.4099	1.2771		0.8973	0.0862	0.9263	0.6145	0.9433		1.1735
	2370	H019																																											0.1241
	2420	H018															1.6896							1.1694	0.89	0.607	0.42	0.6382	0.9468	0.9519	0.197	0.7426	0.7819	0.5568		0.4169			0.4814	0.4663	0.7105	0.7174	0.599	0.7182	0.3547	0.5075	0.478		0.3613
	2420	H019														1.5102	1.1943	0.9	1.835				0.4701			0.9546		0.5647	0.6833	0.7297	0.9285	0.2266	1.1573			0.7643	1.1921	1.5175	1.0639	1.0511		0.8107		1.5555	1.366	0.7538	0.5991		0.9434
	2420	H036																																			1.8469	1.2057	1.0425	1.4533	1.146	1.1538		0.4318	0.5594	0.9135	0.3392		1.7834
	2420	H037																																		0.2126			1.1764	1.3094		0.9365		1.3113	0.3994	0.8637	0.516		0.9626
	2420	H043
	2500	H03																												1.2164	1.0902	0.6716	1.2917	0.2452	1.1558	1.573		2.3052	2.0762	2.0862	1.8256	1.7225	0.9745	1.5321	1.1426	0.9141	0.8423	1.2208	1.8875
	1760	H04														0.8972	0.52	0.585	0.4713	0.3933	0.2205	0.336	0.358	0.4277	0.4197	0.626	0.4273	1.0905	0.7451	1.018	0.8299	0.9332	0.7663	0.5642	0.3785	0.8019	0.8839	1.2018	0.8023	0.7645	0.5622	1.0331	0.3668	1.1023	0.5295	1.0449	0.778		0.7662
	2170	H01															1.3478	0.9487	0.8237	0.5722	1.3036	1.0296	0.6669	1.0801	0.8395	0.5046	0.6419	0.9691	0.9378	0.8691				1.3059	0.6408	0.8866	0.6536	0.298	0.3189	0.9384	1.1221	0.8299	1.0861	0.8952	0.8541	1.5034	0.9185	0.4401	1.054
	2180	H02
Additional stations used to compute basin-averaged erosion rates, but without adequate data to compute post-Morakot trends in sediment discharge
	WRA basin ID	WRA station ID	1948	1949	1950	1951	1952	1953	1954	1955	1956	1957	1958	1959	1960	1961	1962	1963	1964	1965	1966	1967	1968	1969	1970	1971	1972	1973	1974	1975	1976	1977	1978	1979	1980	1981	1982	1983	1984	1985	1986	1987	1988	1989	1990	1991	1992	1993	1994
	2560	H023
	2560	H024
	1420	H058
	1550	H017
	1580	H021
	1630	H025
	1730	H069
	1730	H070
	1740	H08
	2460	H05																																							1.4063	1.1637	0.4838	1.0104	0.4201	0.5875	0.7784		0.6813
[truncated: 27 more columns]

## Sheet: Table S5. Qs
Table S5. Annual estimates of suspended sediment discharge (Mt).
Focus stations (Figure 1 in the main text)
Focus station ID	WRA basin ID	WRA station ID	1948	1949	1950	1951	1952	1953	1954	1955	1956	1957	1958	1959	1960	1961	1962	1963	1964	1965	1966	1967	1968	1969	1970	1971	1972	1973	1974	1975	1976	1977	1978	1979	1980	1981	1982	1983	1984	1985	1986	1987	1988	1989	1990	1991	1992	1993	1994
Southern stations
S1	1730	H043																																												10.9457	17.8618	2.52021	26.9101
S2	1730	H036																		2.59153	3.147	0.200375	1.84902	1.08579	0.661638	1.08869	7.01689	2.97105	2.4268	1.275	2.54163	1.80347	0.237729	1.82334	0.727787	1.91843	2.61705	0.426688	0.30746	1.18566	0.556723	1.83076	1.13222	1.33031	1.88496	1.90843			0.951517
S3	1580	H07																							0.939634	0.46769	0.917048	0.115865	0.20722	1.17507	0.78896	0.462978	0.368234	0.469739		3.31142		1.5645	0.320444	1.38579		1.10681		0.445069	1.83432	0.536157	4.05858		3.23812
S4	1580	H01																			1.23855			0.318212	0.85858		1.20721	0.172144	0.597548	0.52659	0.739008	0.591598	0.477875		0.820862	1.06833	1.35439	0.568926			0.370152	0.570077	0.309821	1.09961			0.244404		0.174578
S5	1510	H049																									11.2386	0.300882	3.35794	0.420058	0.534621	2.97455	0.067385	0.909193	3.47076	1.59932	1.40063	20.2651	37.3496	80.9553	7.55568	30.1042	5.257	12.6826	133.534	1.65134	33.7382	3.81671	44.8308
S6	1510	H075
S7	1510	H071
S8	2200	H020																																9.57024	1.02379	6.4778	2.05023	1.48919	1.27527	1.42061	1.91285	19.6644	1.79841	3.19622	3.51972	4.90786	1.08225	0.266029	2.78215
S9	2200	H022
S10	2200	H011	3.40019	0.780884	0.17747	0.03965	0.478085	16.7604	1.79201	4.19098	18.9976	13.8665	0.538079	0.589003		26.6944	37.6855	19.7067	8.29034	20.5241	46.4717	9.47095	108.747	26.0979	3.62338	15.5544	12.2073	104.573	79.7856	57.2575	38.0023	23.4973	3.38727	82.7226	10.6154	19.4952	12.7301	1.92872	8.32812	19.6472	23.4491	58.5674	12.666	19.1109	22.1424	19.3249	6.51972	2.30809	16.4989
S11	1850	H04
S12	1740	H02																			0.257279	0.106851	0.131889	0.229726	0.083688	0.204482	0.482047	0.08292	0.20053	0.227353	0.351398	0.525403	0.188712	0.192751	0.008054	0.474687	0.238243	0.129884	0.040917	0.112619	0.086306	0.236955	0.170816	0.290182	0.382587	0.163958	0.13531		0.161058
Northern stations
N1	1430	H032																													7.33672	0.120236	0.03604	0.08215	0.095769	1.52699	0.474419	1.20301	0.175483	0.149496	0.240486	0.116476	0.043797	0.136611	0.514406	0.11913	0.206724	0.453028	1.51448
N2	1350	H012																																													0.151581	0.093841	0.388889
N3	1340	H09																																							0.10883		0.050228		0.219151	0.018449	0.039318	0.043385	0.102853
N4	1300	H014																								1.60376	58.056	0.158451	0.855427															0.173242	0.23684	0.025538	0.048098	0.02524	1.11883
N5	1300	H017																																											3.25011	0.187632	0.39018	0.100355	0.642416
N6	1290	H02																							1.04996	0.290547		0.020991	9.52501	0.074582				0.084811			0.024565	0.030658		0.107372						0.187878	0.038848	0.027002	0.023522
N7	1140	H066																							1.40457	0.361524	0.210988	0.472274	0.559444	0.357671	0.302182	0.165835	0.162766	0.080747	0.093525	0.406485	0.299981		0.171467	0.436879	0.122524	0.168669	0.292368	0.257654	0.432135	0.150112	0.455548	0.114629	0.340656
N8	1140	H058															0.047235	0.044687		0.057113	0.220638	0.188556	0.335403	0.036103	0.012683	0.024108	0.021283	0.197479	10.0762	4.72536	0.138537	0.243849	0.113118	0.085013	0.22543	0.172153	0.123496		0.091974	0.082894	0.103334	0.596568	0.168964	0.043292	0.136833	0.03869	0.13259	0.023804	0.062658
N9	2560	H019																																						0.066884	0.018855	0.029564	0.094429	0.180357	0.08598	0.036128	0.039645		0.159629
N10	2560	H06		15.5649	0.882252	2.54219		3.49265	3.58826	2.75727	1.33828	0.882103			18.6388	27.2893	15.6739	31.4803	5.15226	3.70253	2.54404	3.12294	4.28216	0.319543	0.0957	0.115213	0.393981	11.0204	3.81315	1.06456	0.08115	9.26578	8.32268	4.28679	13.7016	32.6229	17.7138	1.41165	6.15919	4.7572	8.15032	9.84502	2.31514	11.1101	3.59925	5.07286	145.471	0.817162	38.704
N11	2420	H024																						175.706	6.98229	31.8719	12.4952	86.1468	35.9469	31.4401	2.0355	11.1487				25.7837		4.12827	15.6213	20.0767	7.90095	40.4986	6.55264	11.1133	22.0948	17.5509	5.91479		13.5354
N12	2370	H017																						74.1661	1.67899	6.65844	1.52035	31.4232	6.16721	5.62037		9.67166	3.5719			28.5715	21.2683		9.25494	14.9344	7.5605	16.0434	12.5638	10.3614	14.6463	11.3728	16.3434		11.4166
Additional stations used to compute post-Morakot trends in sediment discharge
	WRA basin ID	WRA station ID	1948	1949	1950	1951	1952	1953	1954	1955	1956	1957	1958	1959	1960	1961	1962	1963	1964	1965	1966	1967	1968	1969	1970	1971	1972	1973	1974	1975	1976	1977	1978	1979	1980	1981	1982	1983	1984	1985	1986	1987	1988	1989	1990	1991	1992	1993	1994
5	1140	H048																											0.041517	0.0211	0.026443	0.024401	0.027017	0.019435	0.043818	0.04053	0.263296		0.025138	0.271767	0.012496	0.052609	0.009707	0.050095	0.115253	0.019097	0.09374	0.012164	0.048781
6	1140	H049																											0.031842	0.006888	0.015255	0.014286	0.006359	0.006832	0.007999	0.008346	0.013842	0.002341	0.00942	0.038243	0.004064	0.031353	0.004857	0.025251	0.037726	0.021271	0.014075	0.004991	0.00729
11	1140	H068																										2.13747	2.34071		0.066161	0.137481	0.070527	0.094474	0.041263	0.157269	0.071791		0.274639	0.229859	0.060003	0.135588	0.176687	0.03709	0.319449	0.203764	0.145017	0.060165	0.288978
13	1140	H082																																								0.101021	0.011965	0.117152	0.024539	0.028958	0.074995	0.023572	0.06683
23	1300	H013																								0.477758			0.013541	0.11554		0.113233					0.017865							0.066012		0.009922	0.010534	0.010106	0.018809
36	2500	H05																																							2.95045	10.2477	3.32688	2.49179	4.47808	0.769635	1.2311	0.459768	2.10384
39	2560	H017																											0.090574	0.345253	0.136023	2.20605	2.62633	3.76451	12.833	117.646	0.905547	0.373108	9.18793	3.66442	25.9978	5.95385	0.24794	1.23925	4.38258	4.09504	46.4315	0.0644	49.6604
42	2560	H022
45	1340	H08																																							0.241016		0.468913	0.221584	0.693913	0.027802	0.329341	0.32608	0.322512
53	1350	H01																		0.650261	3.69166		1.33278	3.20256	11.2982	1.52579	5.34081						0.473628				0.122003							0.335402		0.030548	0.031287	0.027774	0.12997
56	1350	H017
70	1400	H09																					3.00057	3.32615	10.5587	7.01945	5.08781	0.885522		3.62256	5.6408	8.01478	3.54089			7.71375	0.498057	4.39461	0.553004	0.91262	0.933046	0.651435	0.137055	0.323007	3.45908	0.04632	0.241663	0.097241	2.38227
71	1400	H012																																			0.005817	0.003702	0.003521	0.010335	0.007395	0.005457	0.003131	0.01817	0.045927	0.003299	0.012197	0.002855	0.027377
72	1400	H015																																												0.058283	0.441559	0.051732	2.11858
87	1430	H025																	1.05023			1.20728	2.06955	2.46695	2.61476	0.663373	19.8798	5.50613	6.29863	1.67007	4.77889	2.66472	2.24029	2.76699	1.52923	8.89422	3.58199	6.21349	1.17514	4.59445	1.08368	1.62112	0.359479	2.55498	10.3406	0.736924	1.8648	1.17949	4.95528
88	1430	H028																						0.597499	3.72228	0.479598	5.84784	0.376884	1.02248	0.189721	0.520576	1.02987	0.469588												1.89757	0.299442	0.186854	0.179415	1.97349
90	1430	H030																																	0.499263	5.10109	1.36852	15.6201	0.415833	0.736995	0.26254	0.347465	0.148719	0.517613	2.23119	0.133208	0.658215	1.19396	5.17207
92	1430	H037																																		0.445099	0.362616	0.249527	0.096619	0.077786	0.045076	0.057356		0.095898	0.564604	0.034623	0.066082	0.029012	0.695846
93	1430	H038																																						0.03383	0.082304	0.133593	0.098719	0.343395	1.53903	0.339584	0.333173	0.123475	0.781845
111	1510	H050
113	1510	H057																																								25.5003	12.5452	60.3244	33.8541	51.097	35.6679	4.97683	167.887
115	1510	H063																																															181.929
120	1510	H079
130	1540	H09		2.66021			2.85573	1.82531	0.673657	1.8008		0.094125				1.4764	4.77246	4.60477	1.69007	9.15356	3.08032		6.56379	3.90129	3.53334		3.67593	12.695	1.26563	1.21886	1.12708	2.55705	2.01452	1.63388	0.469338		0.356244		0.345481	2.30692	1.56794	0.848932	0.758912	1.42601	2.31904	0.187988	0.934083	0.21937	0.395357
131	1540	H029																																					0.16139		0.509909	0.219483	0.59557	0.772564	1.148	0.188479	0.973002		0.796394
137	1540	H014														0.021813											0.597888	0.065756	0.090066			0.681225	0.222827	0.122147		0.09033	0.034409		0.043569	0.081602		0.042769		0.235391	0.215225	0.050525			0.069627
140	1550	H012																																															1.01413
147	1580	H08																							0.548999		0.454785		0.131463	0.765252	0.218916	0.581848	0.168846	0.146656		1.13598		0.173663	0.0739		0.220215	0.162615	0.275305		0.434784		0.147995		0.161697
155	1590	H012												2.64263		0.220696		2.53853	0.276139	4.53042	1.29832	0.247892	1.46462	0.548223	1.09729	1.90959	1.97683	0.562997	0.523406	3.13153	0.819641	2.88429	0.651253	0.315233		1.19442	1.15549	0.158793	0.487673	0.221219	0.234725	0.705388	0.521728	0.635738	0.472586	0.255912	0.594483	0.224507	0.682623
160	1630	H05												3.47886	1.99448	2.42908	0.552578	2.82378			1.09098			1.53864	1.36457	2.33245	2.13456	1.18099	0.598822	1.75309	3.21727	6.05412	2.18214	0.303907		1.16291	2.48651	0.143562	0.146155	1.3646	3.4448	1.71632	3.72066			5.1699	8.28133
161	1630	H013																								9.21087	34.2502	8.60665	9.78049	9.37665	2.69908	23.5028	6.27627	5.61134	2.3187	4.50206	18.386	10.9491	3.53948	124.984	0.924156	12.6696	6.29322		687.729	8.28329	13.8439		11.7602
162	1630	H018
163	1630	H020
180	1650	H06																										0.11541	0.094135	0.309154	0.309913	1.03623	0.138549	0.140714	0.002096		0.346707	0.090836	0.197268	0.288138	0.142519	1.0703	0.180558	0.021782		0.049594	0.236941
187	1660	H09																								14.8258	63.5276	8.79831	38.1222	28.5872	28.0042	99.6899		5.33851	0.127822	19.3302									242.872	5.78359	8.18502		9.17629
188	1660	H010																																			40.3425	63.6342	2.95358	73.8814	3.38847	7.45215	11.8341		108.558	40.9301	33.5278		7.55971
200	1730	H058
226	2200	H07								0.675938	3.16745	1.43061	1.40688	1.50463		93.1934	15.787	3.08646	4.22301	11.9821	3.12538	0.996772	43.4323	24.1117	0.508513	1.63129	6.00636	35.7247	11.7003	11.7402	77.0035	21.1069	1.34839	138.434	3.12247	17.3094	7.81807	1.91408	10.1981	12.6221	8.61303	55.805	8.13602	2.35873	5.28029	7.7789	1.19066	0.283188	2.13006
229	2200	H021
233	2200	H027
236	2370	H04																																						1.54627			3.41998	3.08756	6.11698	2.80344	1.29347		4.89144
237	2370	H016																						0.136602	0.081842			1.96897	2.08711	2.83393		0.923705							1.3894						3.30007	3.09897	3.7344		1.21925
239	2370	H018																																		26.9389	346.157			9.79972	7.50905		6.27347	4.32551	15.3838	5.31818	2.27815		7.06953
240	2370	H019																																											0.677989
246	2420	H018															3.51837							12.7816	3.43518	4.53266	3.39439	33.496	15.2938	34.5064	0.297337	7.79115	1.27782	10.6656		37.8085			13.0421	16.8532	3.07259	20.0768	2.63344	4.44457	10.5039	13.5856	2.7783		6.42222
247	2420	H019														9.78975	13.1695	4.0558	6.08024				10.0158			1.0245		7.03784	4.40451	1.86901	0.646832	0.787366	0.673494			9.47751	31.0105	0.487301	3.78299	2.30011		7.90853		3.59449	19.3672	6.57924	2.33562		6.8929
249	2420	H036																																			12.4645	0.317578	2.51742	12.5491	2.43224	4.17709		1.40285	3.34543	1.80786	0.943958		4.62911
250	2420	H037																																		1.7636			4.27589	2.54181		1.30955		1.40611	1.11693	0.816734	0.807388		2.00174
252	2420	H043
257	2500	H03																												265.201	2.73634	2.03803	1.09778	1.97549	10.5153	26.7595		1.65638	30.4287	41.1458	11.3011	58.3297	22.575	9.3852	38.574	6.96689	92.3349	0.793695	81.3282
274	1760	H04														2.04246	2.22214	0.491376	0.295844	0.561912	0.240496	0.172579	0.451572	0.30518	0.191592	0.511249	1.1338	1.33253	0.821332	0.914589	1.99348	1.38983	0.265834	0.833246	0.07917	1.95838	1.20419	0.56775	0.225561	0.502165	0.455611	3.39057	0.201973	4.67996	2.1929	0.79068	2.64559		1.10111
275	2170	H01															10.346	0.165982	0.267536	0.05412	0.763483	0.214792	1.86346	2.19903	0.134073	0.078267	0.167808	4.85714	12.7433	0.628872				0.000185	0.049741	0.44951	0.364072	0.054152	0.224825	0.446028	1.1183	3.00609	1.05088	0.183914	0.545754	0.762761	0.10701	0.052789	0.620378
276	2180	H02
	WRA basin ID	WRA station ID	1948	1949	1950	1951	1952	1953	1954	1955	1956	1957	1958	1959	1960	1961	1962	1963	1964	1965	1966	1967	1968	1969	1970	1971	1972	1973	1974	1975	1976	1977	1978	1979	1980	1981	1982	1983	1984	1985	1986	1987	1988	1989	1990	1991	1992	1993	1994
43	2560	H023
44	2560	H024
86	1420	H058
143	1550	H017
153	1580	H021
166	1630	H025
207	1730	H069
208	1730	H070
220	1740	H08
256	2460	H05																																							4.92175	5.12532	0.979742	4.03501	7.20969	2.419	5.61746		7.31943
[truncated: 28 more columns]
